# Supplementary material for: A three-dimensional flower-like Mn–Ni–Co–O microstructure as a high-performance electrocatalyst for the methanol oxidation reaction
Source: Royal Society of Chemistry journal article supplement (doi:10.1039/d2nj00527a), 2022-01-01
Supplement: d2nj00527a1.pdf [file d2nj00527a1.pdf]

## **Electronic Supplementary Information**

### **Three-dimensional flower-like Mn-Ni-Co-O microstructure as a high-performance electrocatalyst for methanol oxidation reaction**

Dan Jin,<sup>a,b</sup> Zhen Li,<sup>a</sup> Tingting Ma<sup>a</sup> and Zhenghua Wang<sup>a,\*</sup>

<sup>a</sup> *Key Laboratory of Functional Molecular Solids, Ministry of Education, College of Chemistry and Materials Science, Anhui Normal University, Wuhu 241000, People's Republic of China*

<sup>b</sup> *School of Pharmacy, Wannan Medical College, Wuhu 241002, People's Republic of China*

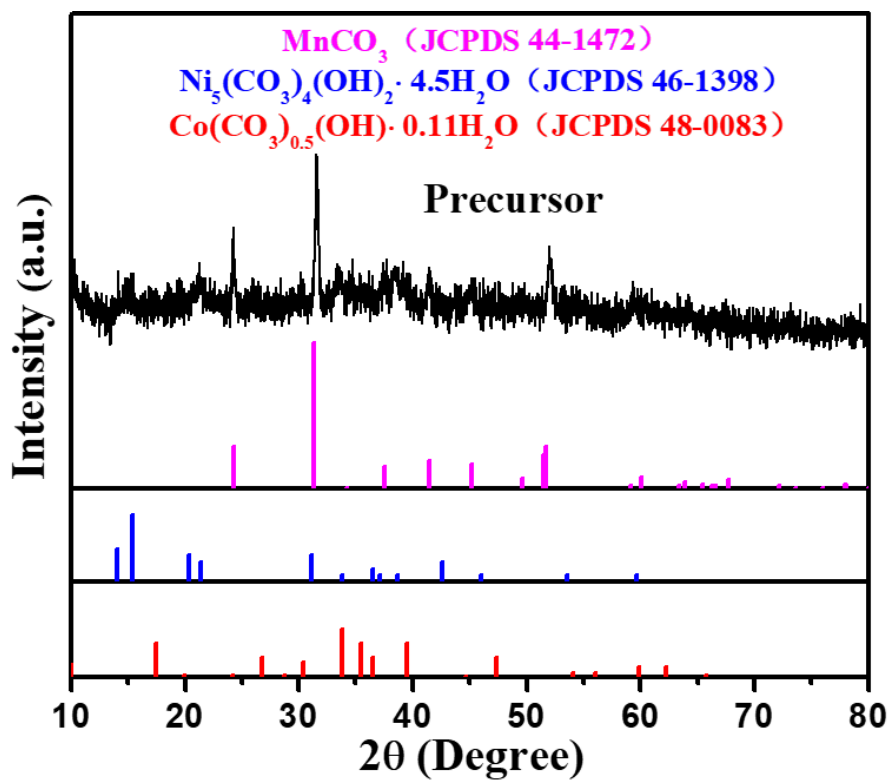

**Fig. S1** XRD pattern of the Mn-Ni-Co precursor.

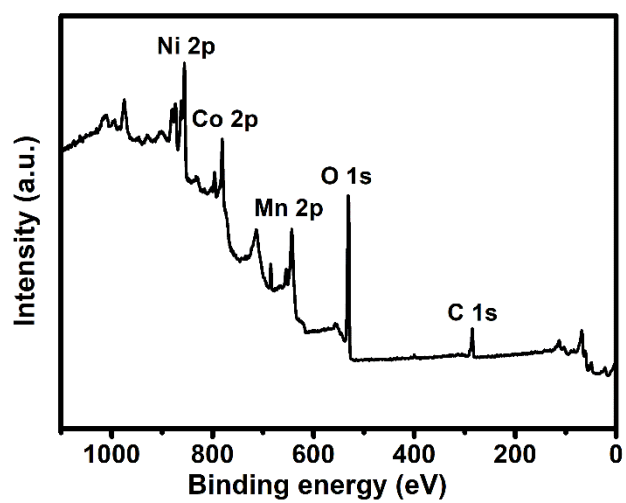

**Fig. S2** XPS survey spectrum of the Mn-Ni-Co-O sample.

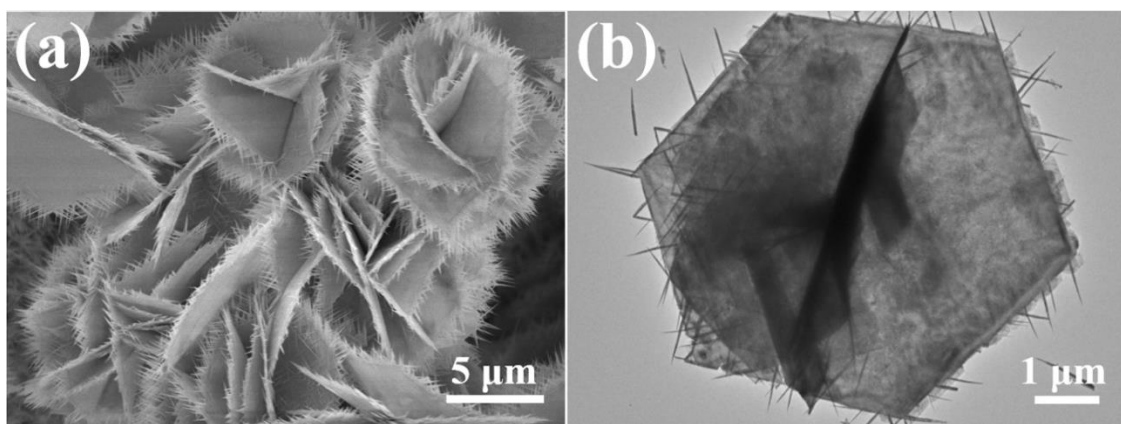

**Fig. S3** (a) SEM image and (b) TEM image of the Mn-Ni-Co precursor.

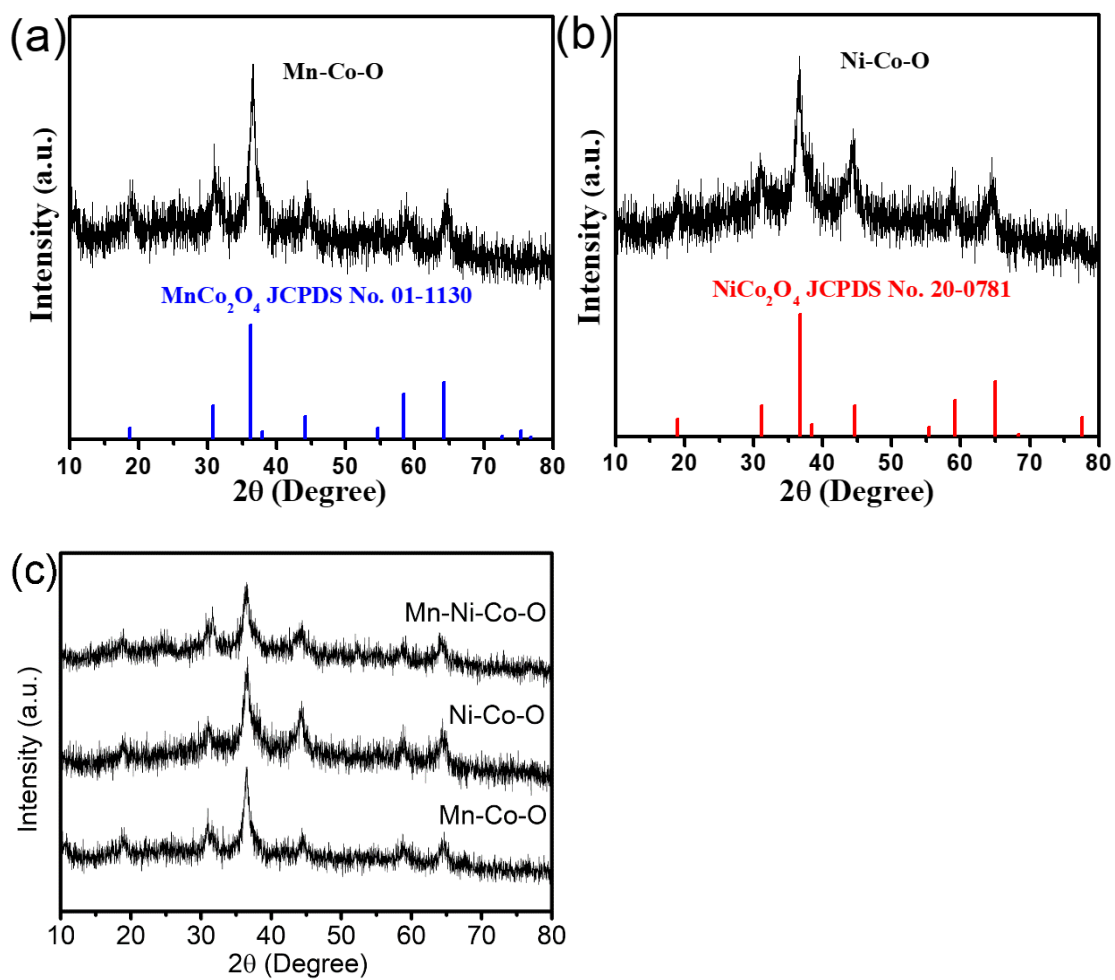

**Fig. S4** (a) XRD pattern of the Mn-Co-O sample; (b) XRD pattern of the Ni-Co-O sample; (c) a comparison of the XRD patterns of Mn-Ni-Co-O, Ni-Co-O and Mn-Co-O samples.

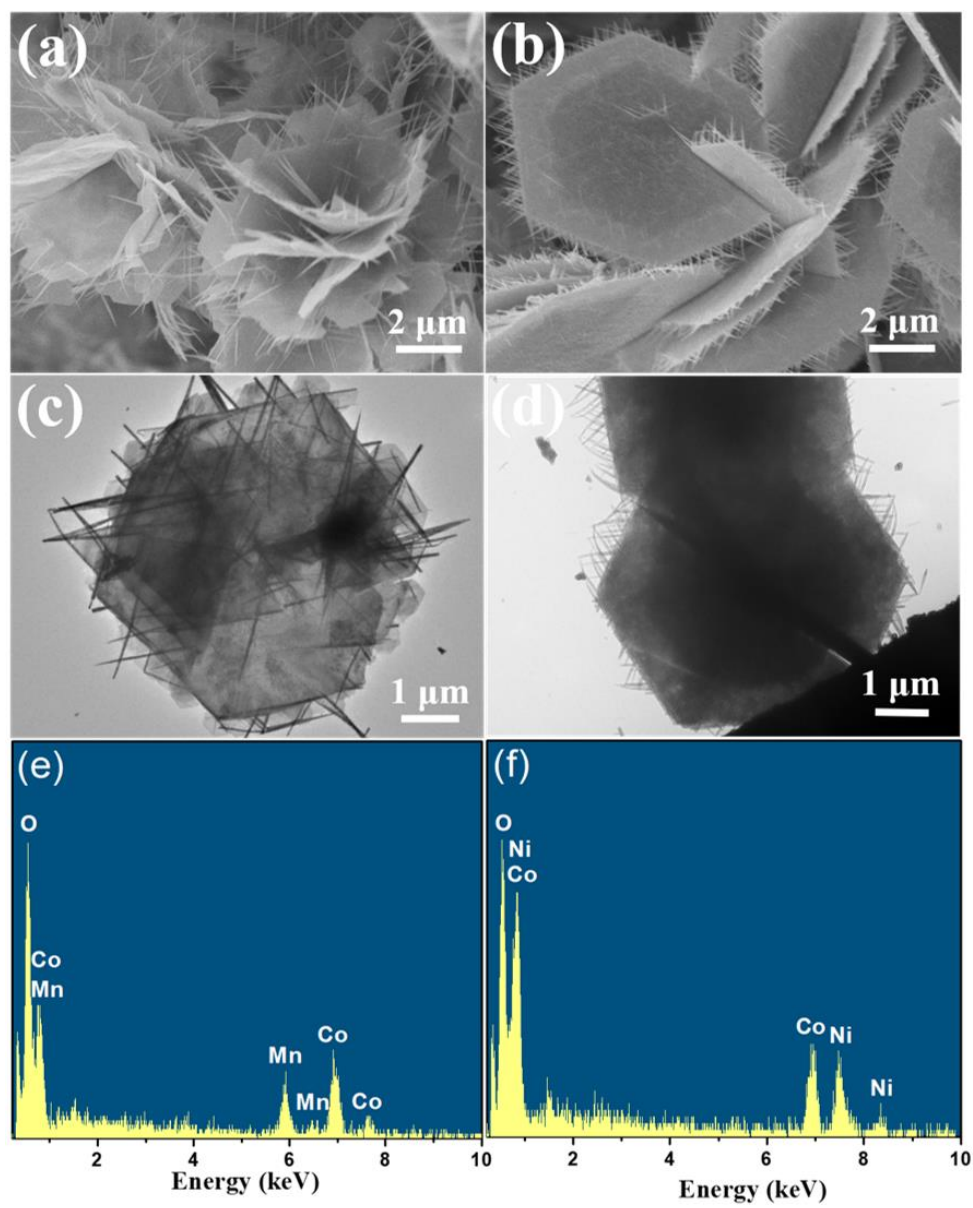

**Fig. S5** (a, b) SEM images; (c, d) TEM images and (e, f) EDX spectra of Mn-Co-O and Ni-Co-O samples.

**Table S1** Comparison of the electrocatalysts in this work with other reports in literature.

| Catalyst                                                         | Potential window (V) | Current density         | Scan rate (mV s <sup>-1</sup> ) | Ref.      |
|------------------------------------------------------------------|----------------------|-------------------------|---------------------------------|-----------|
| Mn-Co-O                                                          | 0–0.6 (vs. Ag/AgCl)  | 33 mA mg <sup>-1</sup>  | 10                              | This work |
| Ni-Co-O                                                          | 0–0.6 (vs. Ag/AgCl)  | 73 mA mg <sup>-1</sup>  | 10                              | This work |
| Mn-Ni-Co-O                                                       | 0–0.6 (vs. Ag/AgCl)  | 113 mA mg <sup>-1</sup> | 10                              | This work |
| MnCo <sub>2</sub> O <sub>4</sub>                                 | 0–0.7 (vs. Ag/AgCl)  | 79.9 A g <sup>-1</sup>  | 10                              | [1]       |
| MnCo <sub>2</sub> O <sub>4</sub>                                 | 1.0–1.62 (vs. RHE)   | 96 A g <sup>-1</sup>    | 10                              | [2]       |
| NiCo <sub>2</sub> O <sub>4</sub>                                 | 0–0.6 (vs. Hg/HgO)   | 50 A g <sup>-1</sup>    | 10                              | [3]       |
| Co <sub>3</sub> O <sub>4</sub> /NiCo <sub>2</sub> O <sub>4</sub> | 0–0.6 (vs. Hg/HgO)   | 140 mA cm <sup>-2</sup> | 10                              | [4]       |
| NiCo <sub>2</sub> O <sub>4</sub> /Ni(OH) <sub>2</sub>            | 0–0.6 (vs. Ag/AgCl)  | 92.3 A g <sup>-1</sup>  | 10                              | [5]       |

**References:**

- [1] G. M. Thorat, H. S. Jadhav, J. G. Seo, *Ceram. Int.*, 2017, **43**, 2670-2679.
- [2] H. S. Jadhav, A. Roy, W. J. Chung, J. G. Seo, *New J. Chem.*, 2017, **41**, 15058-15063.
- [3] L. Qian, L. Gu, L. Yang, H. Yuan, D. Xiao, *Nanoscale*, 2013, **5**, 7388-7396.
- [4] L. Qian, S. Luo, L. Wu, X. Hu, W. Chen, W. Chen, X. Wang, *Appl. Surf. Sci.*, 2020, **503**, 144306.
- [5] B. Wang, Y. Cao, Y. Chen, R. Wang, X. Wang, X. Lai, C. Xiao, J. Tu, S. Ding, *Inorg. Chem. Front.*, 2018, **5**, 172-182.
